# Supplementary material
Source: PubMed Central journal article supplement (PMC7772281)

Supplementary Figure 1

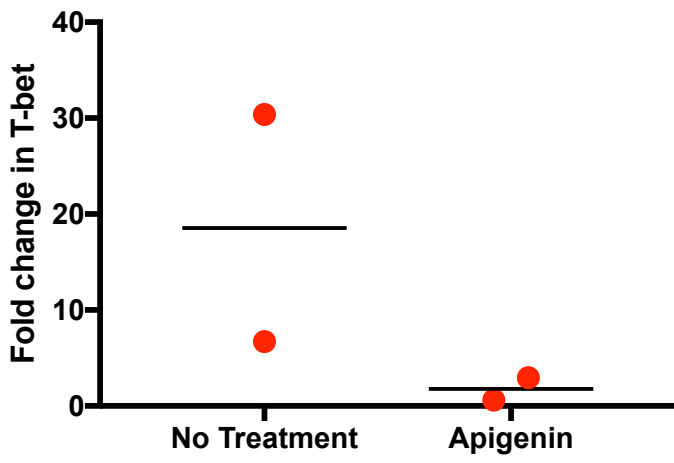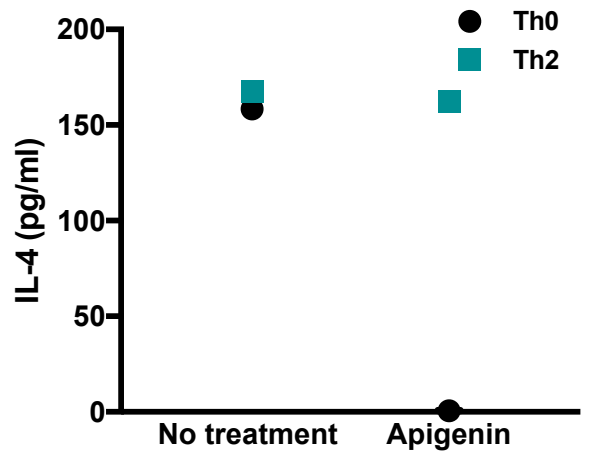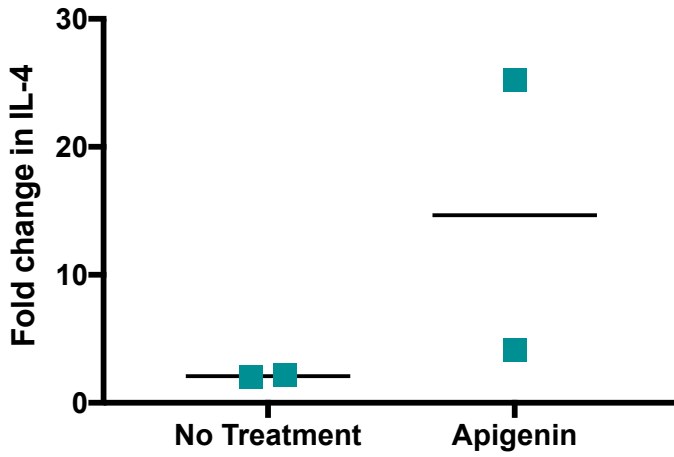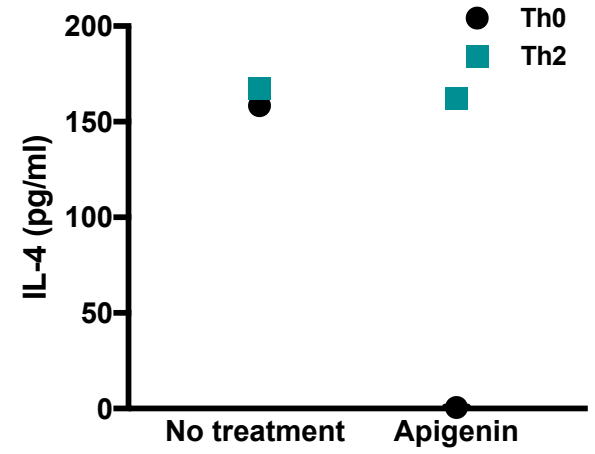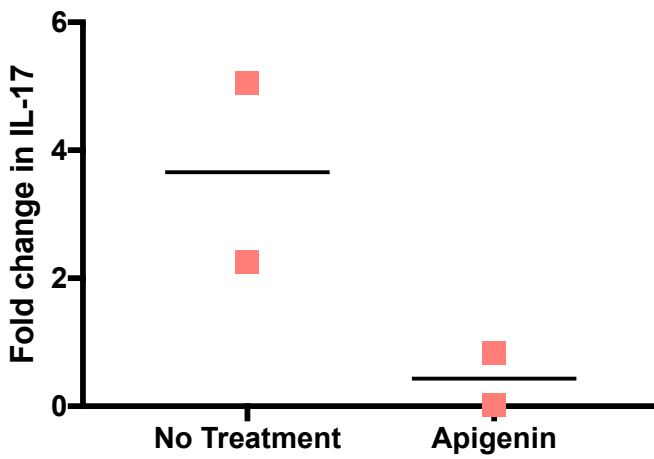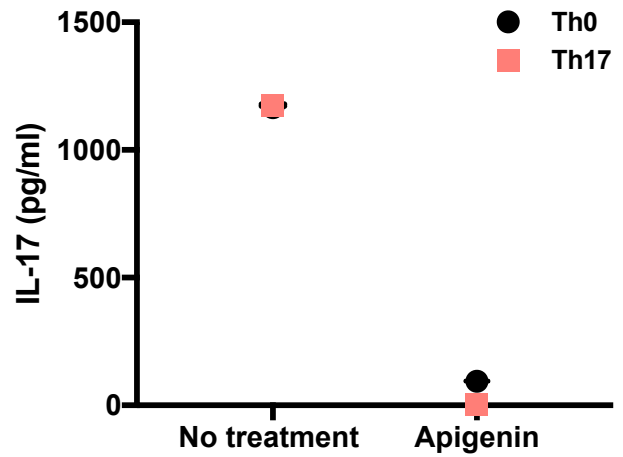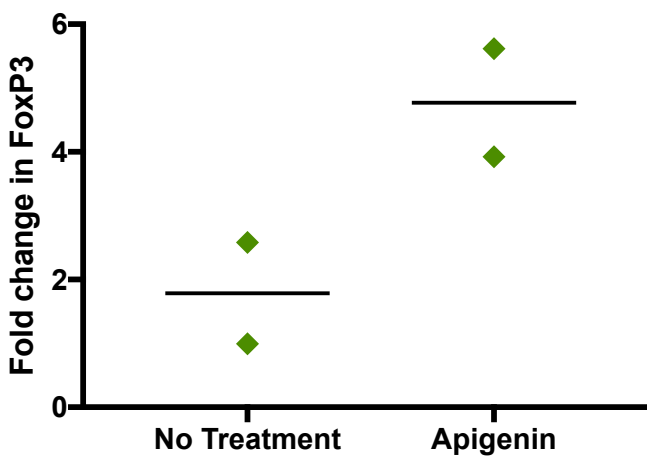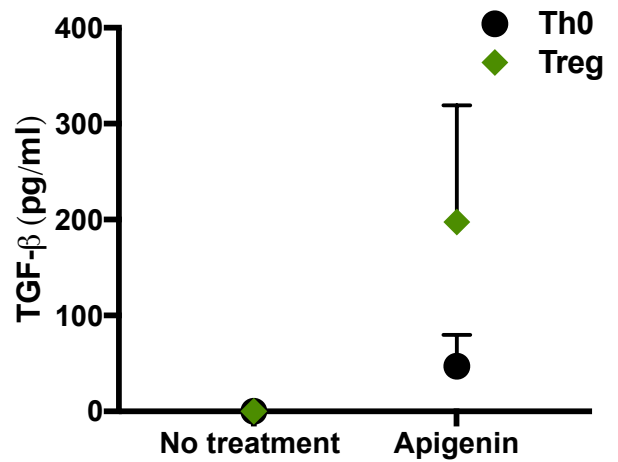

Supplement: NIHMS1608517-supplement-11481_2020_9933_MOESM1_ESM.pdf [file NIHMS1608517-supplement-11481_2020_9933_MOESM1_ESM.pdf]

Supplementary Figure 2

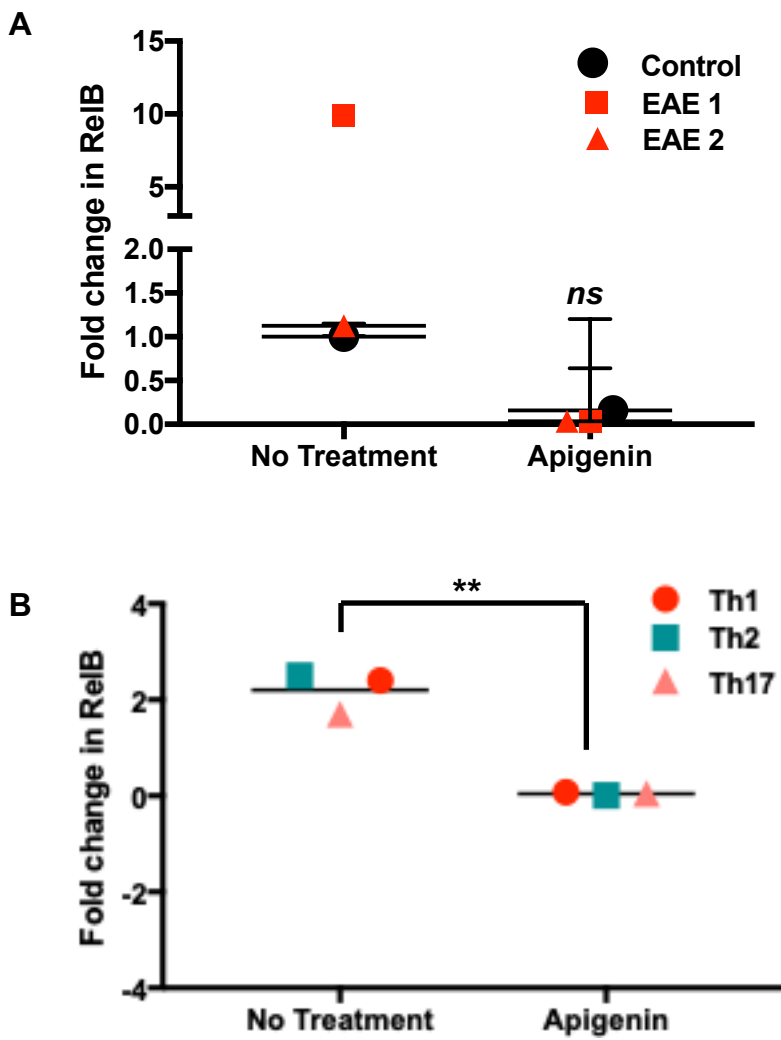

Supplement: NIHMS1608517-supplement-11481_2020_9933_MOESM2_ESM.pdf [file NIHMS1608517-supplement-11481_2020_9933_MOESM2_ESM.pdf]

# Supplementary Figure 3

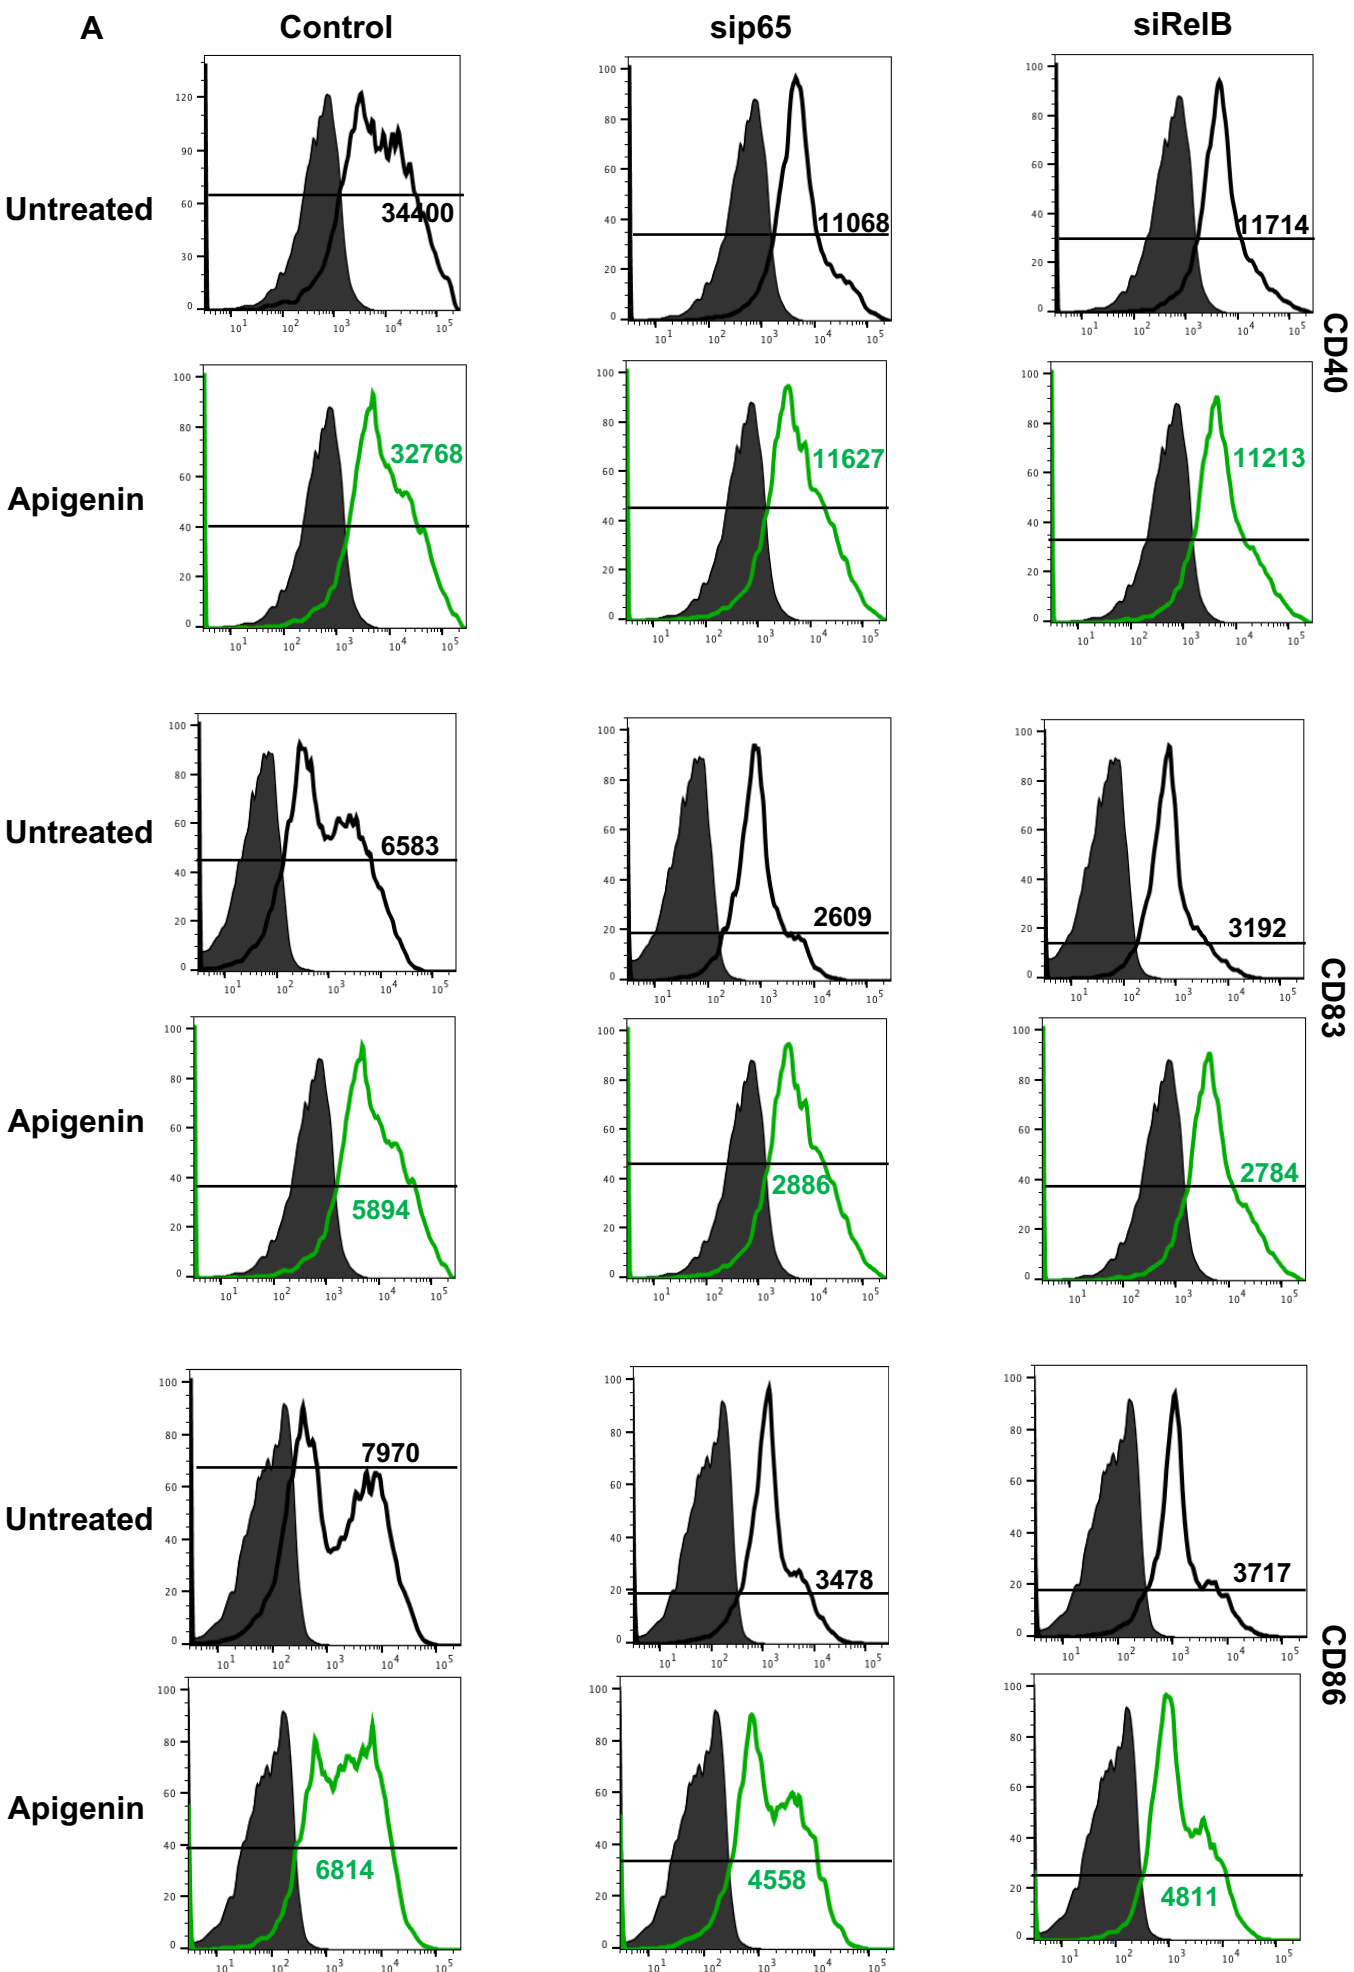

Supplement: NIHMS1608517-supplement-11481_2020_9933_MOESM3_ESM.pdf [file NIHMS1608517-supplement-11481_2020_9933_MOESM3_ESM.pdf]

Supplementary Figure 4

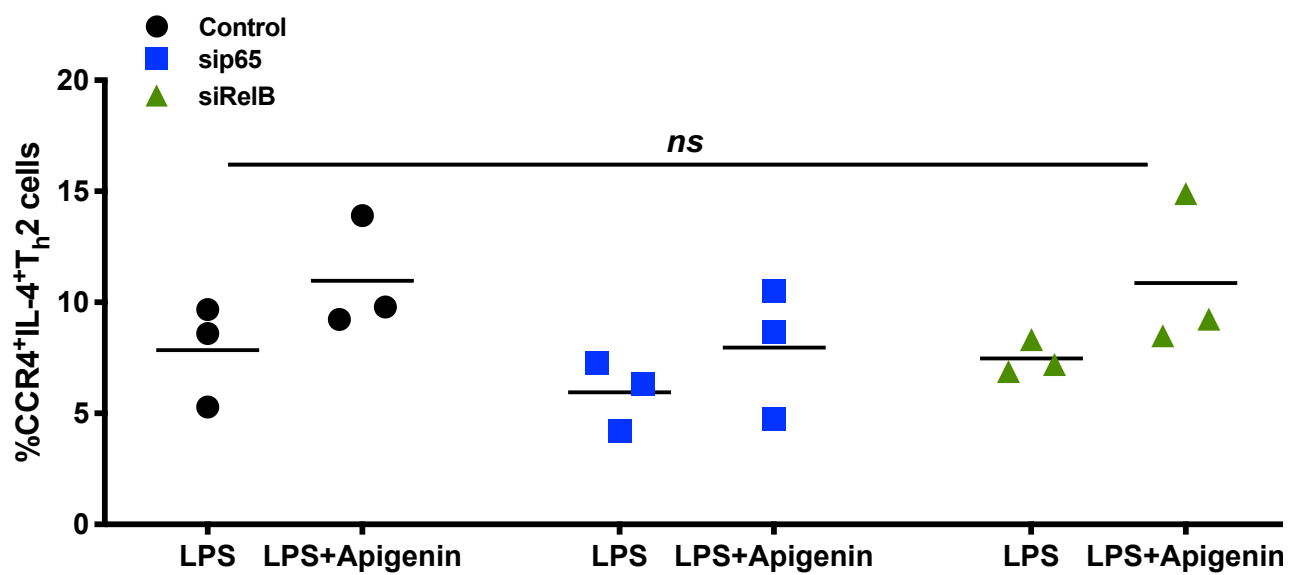

Supplement: NIHMS1608517-supplement-11481_2020_9933_MOESM4_ESM.pdf [file NIHMS1608517-supplement-11481_2020_9933_MOESM4_ESM.pdf]

# Supplementary Figure 5

**B**

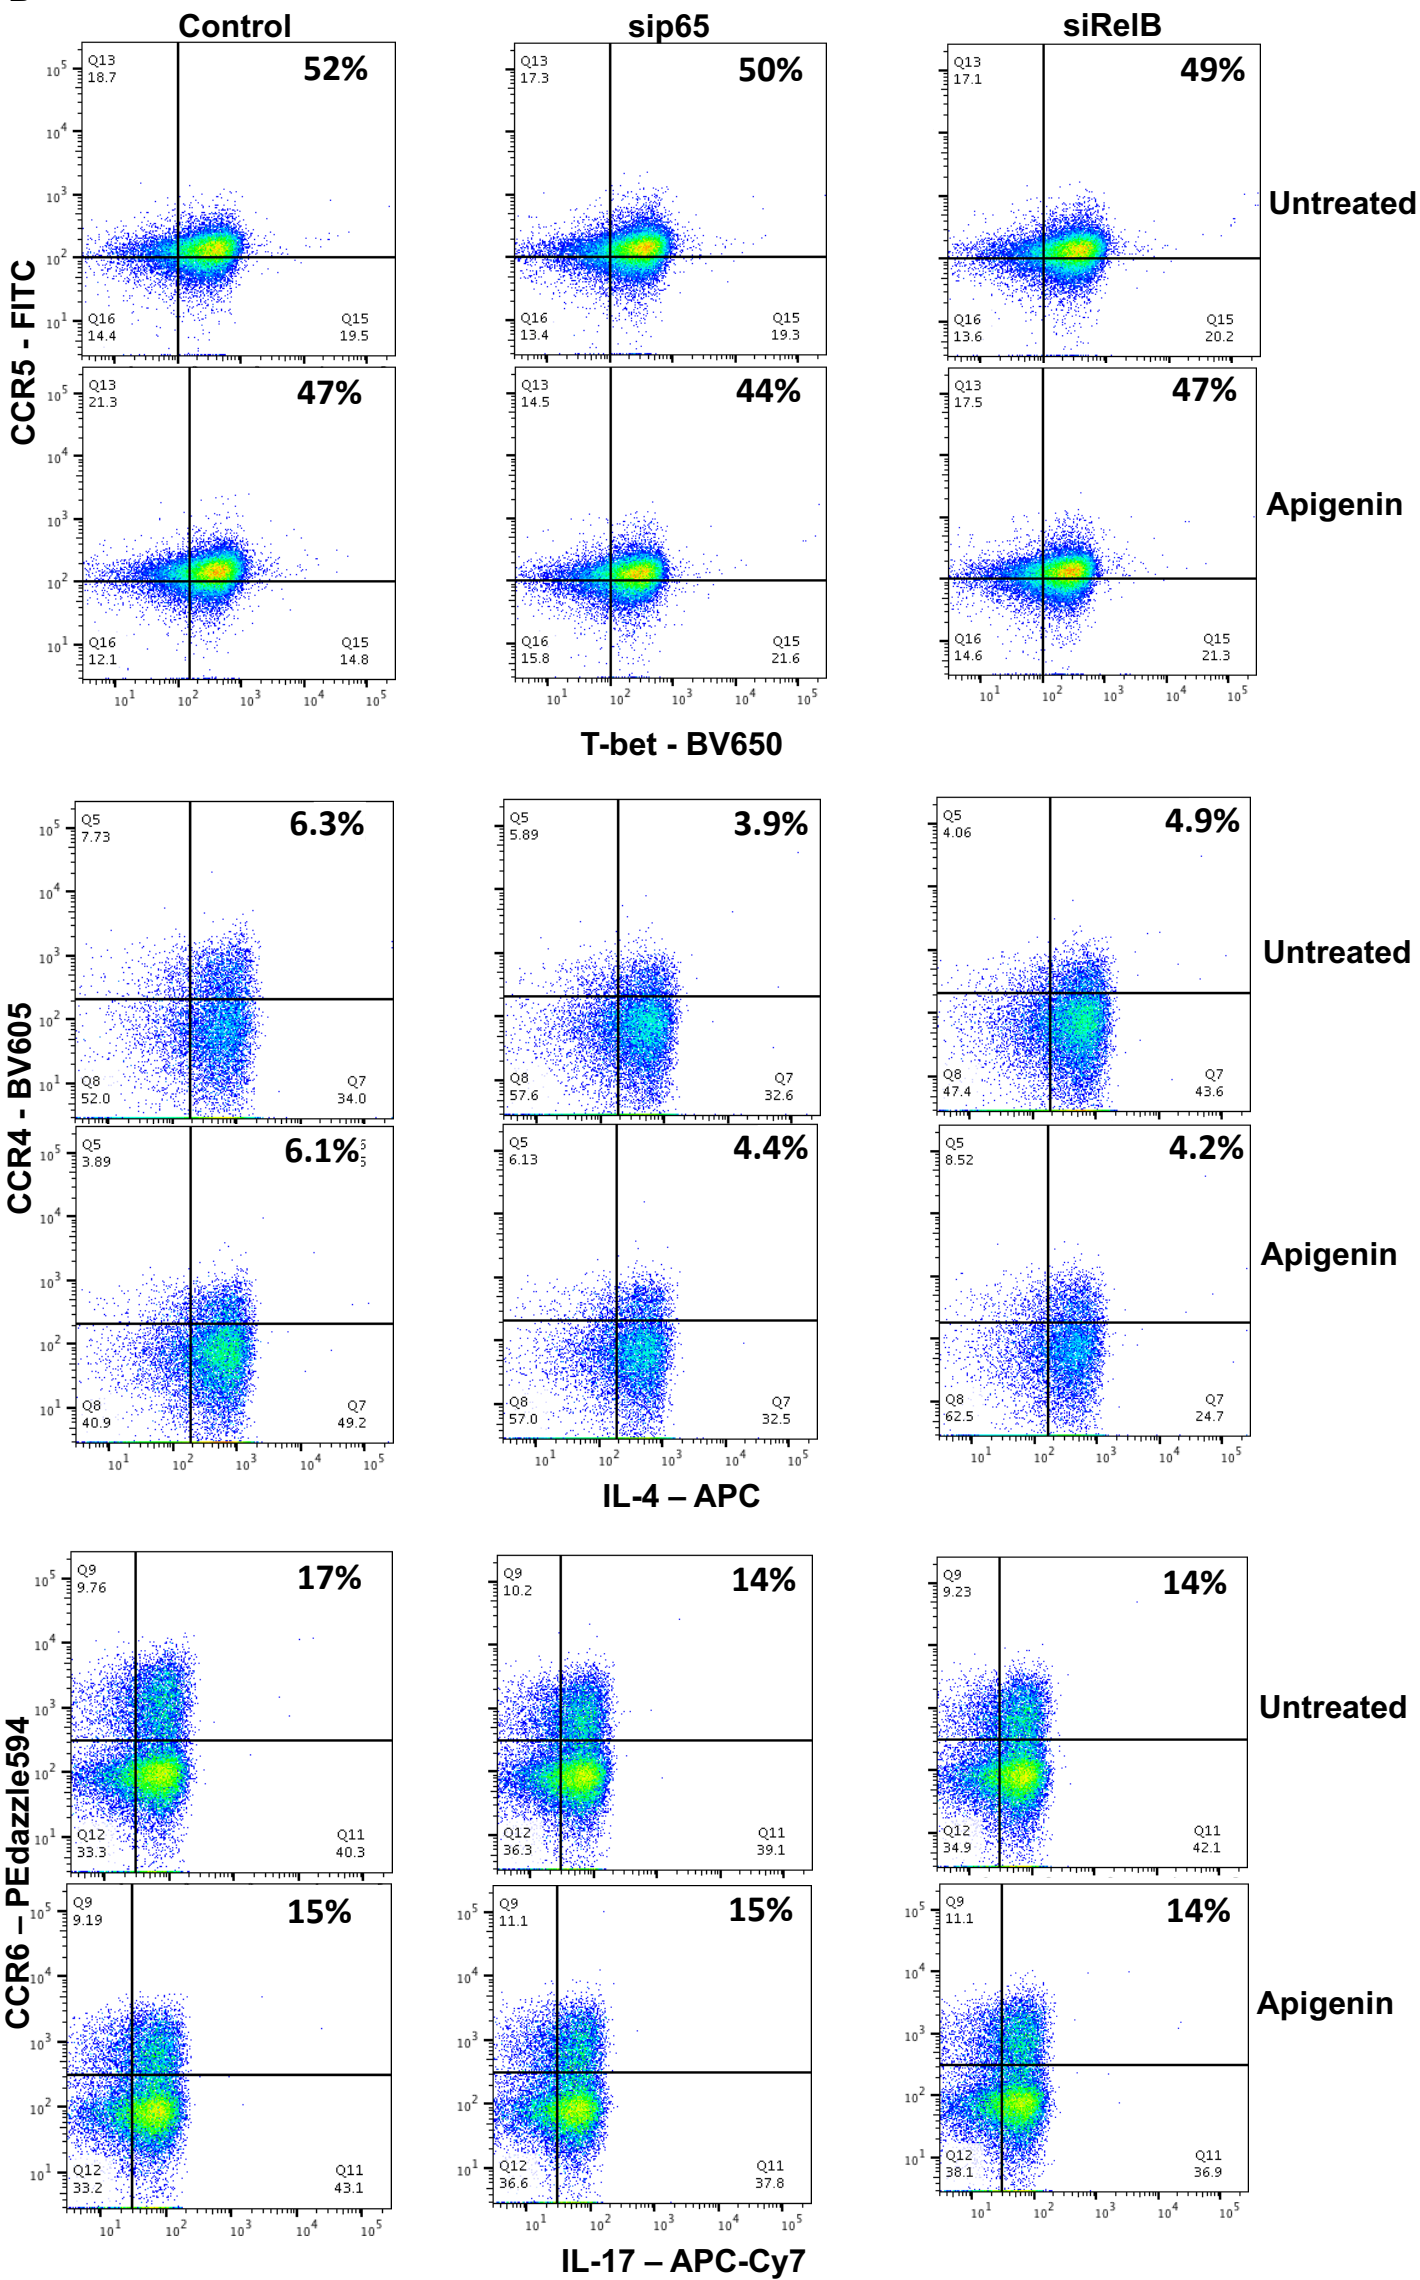

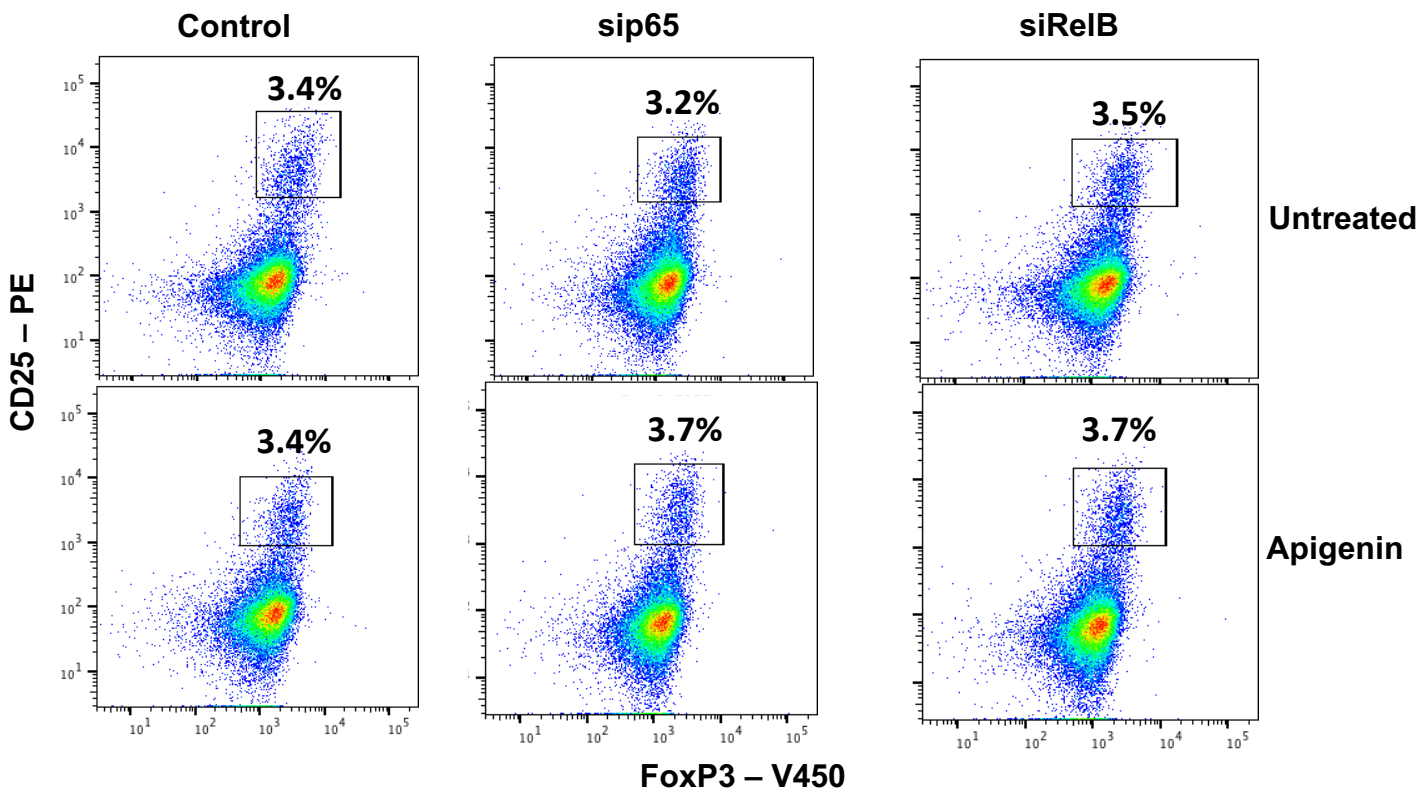

Supplement: NIHMS1608517-supplement-11481_2020_9933_MOESM5_ESM.pdf [file NIHMS1608517-supplement-11481_2020_9933_MOESM5_ESM.pdf]
